# Supplementary figures and images for: Optimization of SPIO Injection for Sentinel Lymph Node Dissection in a Rat Model
Source: MDPI journal article supplement (doi:10.3390/cancers13195031), 2021-10-08

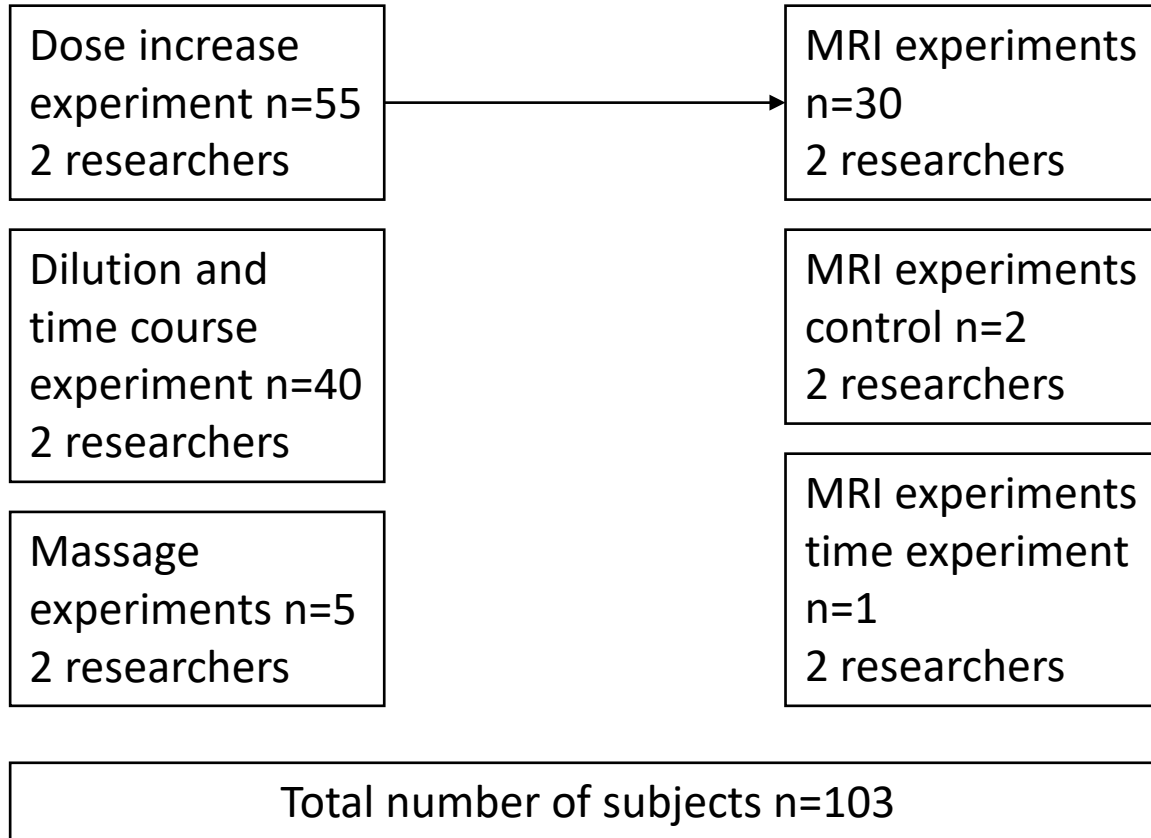

Supplement: s1 [file s1]
